# Supplementary material
Source: publisher site journal article supplement (https://www.dovepress.com/article/518509)
Supplement: Supplementary file 1 [file 16_Apr_2025_Figure_S1.docx]

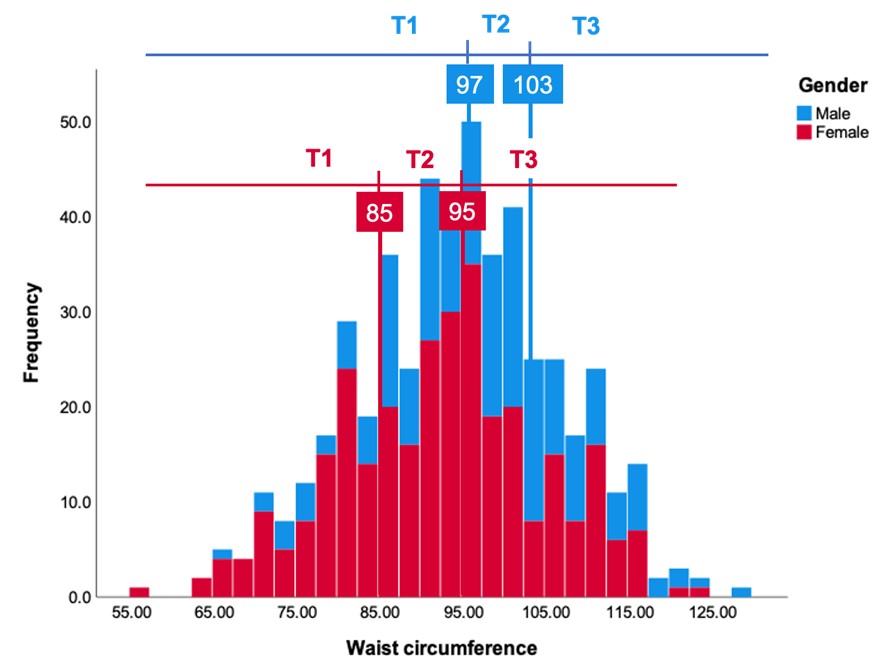


Figure S1. Histogram of Waist Circumference in Males (Blue) and Females (Red), categorized into distinct Tertile groups based on the histogram.
